**Case  
Report**

## A Resected Case of Solitary Pulmonary Capillary Hemangioma Showing Pure Ground Glass Opacity

Yasuto Sakaguchi, MD,<sup>1</sup> Noritaka Isowa, MD,<sup>2</sup> Hirokazu Tokuyasu, MD,<sup>3</sup> and Hiroshi Miura, MD<sup>4</sup>

**A 53-year-old Japanese woman was referred to our hospital for pure ground glass opacity (GGO) in the left upper lung on computed tomography. 18F-fluorodeoxyglucose positron emission tomography revealed no abnormal uptake in the lesion. After 4 months of follow-up, we strongly suspected the lesion to be a bronchioloalveolar carcinoma and decided to perform a surgery for diagnosis. Planning to perform lingual segmentectomy by video-assisted thoracic surgery (VATS) with mini thoracotomy, we finally performed the left upper lobectomy to guarantee the optimal margin by VATS, because the lesion was not identified by palpation. Final pathological diagnosis was a solitary pulmonary capillary hemangioma (SPCH). We herein report a resected case of SPCH showing pure GGO and review all reported SPCH cases.**

**Keywords:** solitary pulmonary capillary hemangioma, pulmonary capillary hemangiomatosis, ground-glass opacity, bronchioloalveolar carcinoma

### Introduction

Solitary pulmonary capillary hemangioma (SPCH) is a rare benign lung tumor of good prognosis. To our knowledge, only 7 adult SPCH cases have been reported. We herein report a resected case of SPCH showing pure ground-glass opacity (GGO) and review all reported SPCH cases.

<sup>1</sup>Department of Thoracic Surgery, Tenri Hospital, Nara, Japan

<sup>2</sup>Department of Thoracic Surgery, Matsue Red Cross Hospital, Shimane, Japan

<sup>3</sup>Department of Respiratory Medicine, Matsue Red Cross Hospital, Shimane, Japan

<sup>4</sup>Department of Pathology, Matsue Red Cross Hospital, Shimane, Japan

Received: December 6, 2012; Accepted: January 9, 2013

Corresponding author: Yasuto Sakaguchi, MD. Department of Thoracic Surgery, Tenri Hospital, 200 Mishima, Tenri, Nara 632-8552, Japan

Email: y036eb@nifty.com

©2014 The Editorial Committee of *Annals of Thoracic and Cardiovascular Surgery*. All rights reserved.

### Case Report

A 53-year-old Japanese woman was referred to our hospital for further evaluation and treatment of an abnormal shadow on medical checkup computed tomography (CT). The chest CT showed a pure GGO lesion measuring 20 mm in diameter in the left upper lung (**Fig. 1a**). <sup>18</sup>F-fluorodeoxyglucose positron emission tomography (FDG-PET) revealed no abnormal uptake in the lesion. She had received medication for hypothyroidism for 8 years. Laboratory findings, including tumor markers such as CEA and CYFRA, were normal. We considered the lesion to be a probable focal inflammation and kept it under observation. A follow-up CT scan 4 months later, however, demonstrated no change in the appearance of the lesion. We strongly suspected the lesion to be a BAC and decided to perform surgery for this diagnosis, with the informed consent from the patient and her family. Although we planned to perform lingual segmentectomy by VATS with mini thoracotomy, the lesion was not identified by palpation. We finally decided to perform a left upper lobectomy to guarantee an optimal margin by

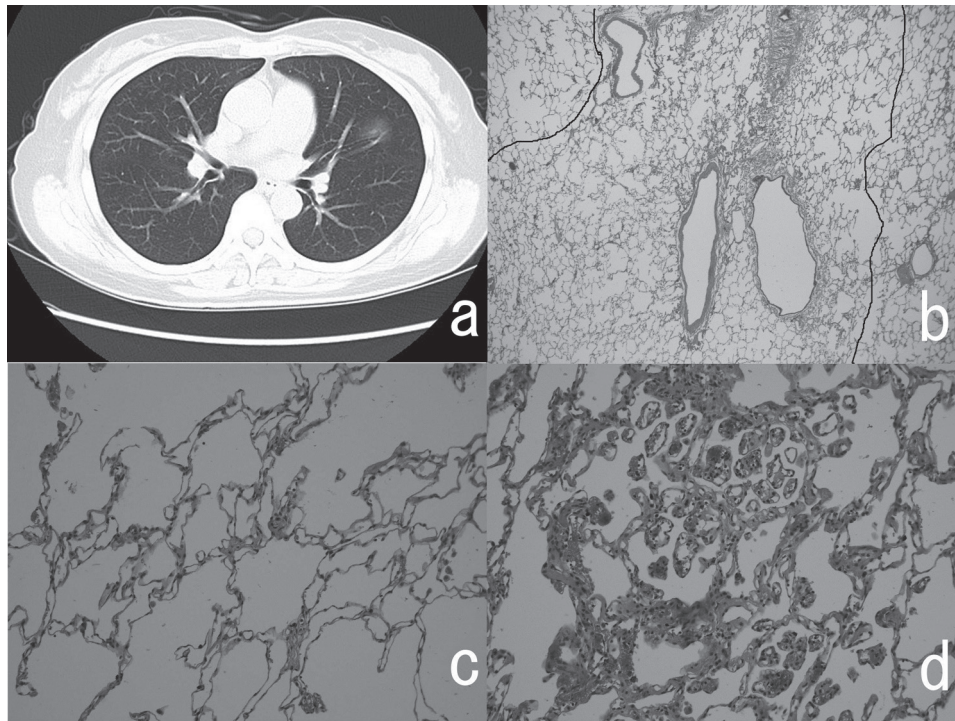

**Fig. 1** (a) Chest computed tomography (CT) showing a pure ground-glass opacity (GGO) lesion measuring 20 mm in diameter in the left S4 near the boundary between S<sup>4</sup> and S<sup>1+2</sup>. (b, c) The lesion shows thickening of alveolar septa caused by the proliferation of capillary vessels without cytological atypia. (d) A thickened alveolar wall and partial glomerular-like change are shown.

VATS. A pathologic examination showed thickening of alveolar septa caused by the proliferation of the capillary vessels without cytological atypia and immunohistochemical staining for CD34 in the lesion. Final diagnosis was a solitary pulmonary capillary hemangioma (**Fig. 1b, 1c, and 1d**). The postoperative course was uneventful, and she was followed up for 15 months after surgery with no recurrence.

## Discussion

Pulmonary capillary hemangiomatosis (PCH) has been described as a disease that presents as multiple nodules in the lung. Prognosis of PCH is poor because it is characteristically associated with pulmonary hypertension or veno-occlusive disease.<sup>1)</sup> On the other hand, solitary pulmonary capillary hemangioma (SPCH), named by Fugo, is a rare disease that is characterized by a good prognosis because it is not associated with a specific clinical disorder.<sup>2)</sup> To our knowledge, only a few cases of SPCH in infants and 7 cases in adults have been reported.<sup>2–7)</sup>

Before Fugo's first SPCH report, Havlik, et al. had reported 8 autopsy cases with solitary or paired PCH-like foci that were found incidentally in the lung. These 8 cases did not present with pulmonary hypertension, and PCH was unrelated to the cause of death.<sup>8)</sup> Fugo pointed out that a few of Havlik's cases were applicable to PCH in a clinical setting, such as age and the absence of specific symptoms.<sup>2)</sup>

On reviewing 8 SPCH cases, there were 4 males and 4 females, and the age range of SPCH cases was 45–59 years (mean age 53.1 years  $\pm$  SD 4.2) (**Table 1**). Havlik's cases were 8 males, and the age range was 56–77 years (mean age 67.9 years  $\pm$  SD 6.3).<sup>8)</sup> There were 17 males and 18 females in the previously reported PCH cases, and the age range was 6–71 years (mean age 34.5 years  $\pm$  SD 19.1).<sup>9)</sup> The prognosis of PCH cases was 28 deaths for several days to years after the diagnosis, 3 cases cured by surgery, 2 cases improved by IFN- $\alpha$ -2a and 2 who were still living.<sup>9)</sup> In contrast to PCH cases, the mean age of SPCH cases was higher than PCH cases, and all SPCH cases were alive in good health. These results suggest that SPCH is differentiated clinically

Table 1 Patient profile of SPCH

| Case             | Sex/Age   | Detected           | CT finding                                      | Chest Xp             | Location/Surgery                                                                   | Pathological finding                                                                                                                                                                                        |
|------------------|-----------|--------------------|-------------------------------------------------|----------------------|------------------------------------------------------------------------------------|-------------------------------------------------------------------------------------------------------------------------------------------------------------------------------------------------------------|
| Case 1/Fugo      | Male/56   | medical<br>checkup | GGO with partial solid<br>lesion 13 × 12 mm     | ground-glass opacity | Left lower lobe/<br>partial resection<br>of Left lower lobe;<br>S9+10              | The lesion showed thickening of alveolar<br>septa caused by the proliferation of the capillary<br>vessels without cytological atypia or an<br>inflammatory background. Staining for CD34<br>Same as Case 1W |
| Case 2/Fugo      | Female/48 | medical<br>checkup | GGO with partial solid<br>lesion 13 × 12 × 8 mm | not described        | Right middle lobe/<br>partial resection of<br>Right middle lobe                    |                                                                                                                                                                                                             |
| Case 3/Yanagawa  | Male/58   | medical<br>checkup | Thick GGO 8 mm                                  | not described        | Right lower lobe/<br>partial resection of<br>Right middle lobe                     | The lesion showed thickening of alveolar septa<br>caused by the proliferation of the capillary<br>vessels without cytological atypia. Staining for<br>CD31 and CD34                                         |
| Case 4/Uekami    | Female/54 | medical<br>checkup | Solid nodule 12 × 11 ×<br>8 mm                  | No finding           | Right middle lobe/<br>peripheral: partial<br>resection of Right<br>middle lobe; s4 | The lesion showed thickening of alveolar septa<br>caused by the proliferation of the capillary<br>vessels with slightly cytological atypia. Staining<br>for CD34                                            |
| Case 5/Kato      | Male/55   | medical<br>checkup | GGO with partial solid<br>lesion 11 mm          | No finding           | Right lower lobe/<br>Segmentectomy of<br>Right lower lobe; S8                      | The lesion showed thickening of alveolar septa<br>caused by the proliferation of the capillary<br>vessels without cytological atypia. Staining for<br>CD31 and CD34                                         |
| Case 6/Hakiri    | Male/45   | medical<br>checkup | GGO with partial solid<br>lesion 12 × 11 mm     | small nodule         | Left lower lobe/<br>partial resection of<br>Left lower lobe with<br>marking; s9    | The lesion showed thickening of alveolar septa<br>caused by the proliferation of the capillary<br>vessels without cytological atypia. Staining for<br>CD31 and CD34                                         |
| Case 7/Taniguchi | Female/59 | medical<br>checkup | Thick GGO 11 × 5 mm                             | Thin small nodule    | Right lower lobe;<br>peripheral/partial<br>resection of Right<br>lower lobe; S9    | The lesion showed thickening of alveolar septa<br>caused by the proliferation of the capillary<br>vessels without cytological atypia. Staining<br>for CD34                                                  |
| Case 8/Our Case  | Female/53 | medical<br>checkup | Thick GGO 20 × 20 ×<br>18 mm                    | No finding           | Left upper lobe/left<br>upper lobectomy;                                           | The lesion showed thickening of alveolar septa<br>caused by the proliferation of the capillary<br>vessels and partial glomerular-like change.<br>Staining for CD31 and CD34                                 |

from PCH. SPCH was reported as a good prognosis, but the long-term follow up data had never been reported. Havlik's cases, in which PCH was unrelated to the cause of death, were probably the natural course of SPCH. The difference between the mean age of Havlik's cases and SPCH cases might be one of evidences for a good prognosis in SPCH.

All SPCH cases were without symptoms and detected by a medical checkup. 7 SPCH cases showed a GGO with a high intensity or partial solid lesion, and only one case showed a solid lesion on CT (**Table 1**). These differences in image findings reflected the density of the capillary vessels proliferation because all SPCH cases had the same pathological findings, which showed thickening of alveolar septa caused by the proliferation of capillary vessels without cytological atypia (**Table 1**). SPCH and Havlik's cases have pathological findings in common, same as the SPCH cases, and all Havlik's cases showed a thickening of alveolar septa caused by the proliferation of capillary vessels without cytological atypia.<sup>8)</sup> Additionally, there were no Havlik's cases that showed substantial luminal obstruction or secondary thromboembolism by proliferating capillary vessels.<sup>8)</sup>

The cause of SPCH and PCH remain unknown, but evidence of increased expression of vascular endothelial growth factor and platelet-derived growth factor activity in patients with PCH have been reported.<sup>10)</sup> In PCH case, these factors might be locally related to the cause of lesions.

It was reported to be easy to identify the SPCH which was located near pleura and to be excised by sublobar resection or segmentectomy for diagnosis and treatment (**Table 1**). In our case, the lesion was only detected as a pure GGO on CT, and was difficult to be examined by palpation during the operation. The recent spread of CT leads to the facile detection of a small-sized GGO lesion, which is probably a bronchioloalveolar carcinoma, an atypical adenomatous hyperplasia, or a focal infective lesion. It is difficult to distinguish a malignant lesion from a small-sized GGO on CT or FDG-PET. Because the diagnostic methods such as a bronchoscopic examination or a CT-guided needle biopsy are not helpful, the operation for diagnosis is often required. Although standard surgical treatment for non-small cell lung cancer is a lobectomy, sublobar resection or segmentectomy within the optimal margin is acceptable for treatment for BAC presenting pure GGO less than 20 mm in diameter. In our case, however, the optimal margin could

not be decided; thus, lobectomy was selected.

8 SPCH cases have been reported in the past, and Havlik's cases might be applicable to SPCH.

## Conclusion

SPCH should be considered in the differential diagnosis of a GGO lesion.

## Disclosure Statement

None declared.

## References

- 1) Eltorky MA, Headley AS, Winer-Muram H, et al. Pulmonary capillary hemangiomatosis: a clinicopathologic review. *Ann Thorac Surg* 1994; **57**: 772-6.
- 2) Fugo K, Matsuno Y, Okamoto K, et al. Solitary capillary hemangioma of the lung: report of 2 resected cases detected by high-resolution CT. *Am J Surg Pathol* 2006; **30**: 750-3.
- 3) Yanagawa N, Kato H, Kanauchi N, et al. Two cases of solitary peripheral small lung tumor needed to differentiate from small lung adenocarcinoma. *Japanese journal of diagnostic pathology* 2007; **24**: 426-9.
- 4) Uegami S, Hirai S, Mitsui N, et al. A case of solitary capillary hemangioma of the lung. *The journal of the Japanese Association for Chest Surgery* 2008; **22**: 641-4.
- 5) Kato H, Oizumi H, Kanauchi N, et al. A case of pulmonary capillary hemangioma diagnosed by thoracoscopic segmentectomy. *The Journal of the Japanese Association for Chest Surgery* 2009; **23**: 932-5.
- 6) Hakiri S, Agatsuma H, Yoshioka H. A resected case of capillary hemangioma of the lung suspected to be lung cancer on chest computed tomography. *Haigan* 2010; **50**: 841-5.
- 7) Taniguchi D, Taniguchi H, Sano I, et al. [Solitary capillary hemangioma in the lung: report of a case]. *Kyobu Geka* 2010; **63**: 423-5.
- 8) Havlik DM, Massie LW, Williams WL, et al. Pulmonary capillary hemangiomatosis-like foci. An autopsy study of 8 cases. *Am J Clin Pathol* 2000; **113**: 655-62.
- 9) Moritani S, Ichihara S, Seki Y, et al. Pulmonary capillary hemangiomatosis incidentally detected in a lobectomy specimen for a metastatic colon cancer. *Pathol Int* 2006; **56**: 350-7.
- 10) Frazier AA, Franks TJ, Mohammed TL, et al. From the Archives of the AFIP: pulmonary veno-occlusive disease and pulmonary capillary hemangiomatosis. *Radiographics* 2007; **27**: 867-82.
